# Supplementary material for: The Structure of the “Vibration Hole” around an Isotopic Substitution—Implications for the Calculation of Nuclear Magnetic Resonance (NMR) Isotopic Shifts
Source: MDPI journal article supplement (doi:10.3390/molecules25122915), 2020-06-24
Supplement: s1 [file s1]

# Supporting information

Jürgen Gräfenstein

## The structure of the "vibration hole" around an isotopic substitution. Implications for the calculation of NMR isotopic shifts

### Contents

|                                                                          |           |
|--------------------------------------------------------------------------|-----------|
| <b>S1 Description of the zip file in the SI</b>                          | <b>S1</b> |
| <b>S2 Isotope effects on geometry parameters and NMR isotopic shifts</b> | <b>S2</b> |
| S2.1 Molecules in Sec. 3.1 . . . . .                                     | S2        |
| S2.2 Molecules in Sec. 3.2 . . . . .                                     | S7        |
| S2.3 Molecules in Sec. 3.3 . . . . .                                     | S9        |

### List of Tables

|     |                                                                                                                                             |     |
|-----|---------------------------------------------------------------------------------------------------------------------------------------------|-----|
| S1  | NMR isotopic shifts for a single H/D substitution in benzene . . . . .                                                                      | S2  |
| S2  | NMR isotopic shifts for a single H/D substitution in cyclohexane . . . . .                                                                  | S2  |
| S3  | NMR isotopic shifts for a single H/D substitution in norbornane . . . . .                                                                   | S3  |
| S4  | NMR isotopic shifts for a single H/D substitution in adamantane . . . . .                                                                   | S3  |
| S5  | Isotope effects on selected bond distances in the compounds considered in Sec. 3.1 . . . . .                                                | S4  |
| S6  | Isotope effects on selected mean-square vibration amplitudes in the compounds considered in Sec. 3.1 . . . . .                              | S5  |
| S7  | Isotope effects on the amplitude covariances with in the compounds considered in Sec. 3.1. . . . .                                          | S6  |
| S8  | NMR isotopic shifts for a H/D substitution at H2 in pyridine and bpeb-derivative complexes . . . . .                                        | S7  |
| S9  | Isotope effects on selected bond distances in pyridine and bpeb-derivative complexes . . . . .                                              | S7  |
| S10 | Isotope effects on the mean-square vibration amplitudes in pyridine and bpeb-derivative complexes . . . . .                                 | S8  |
| S11 | Isotope effects on the amplitude covariances with in pyridine and bpeb-derivative complexes . . . . .                                       | S8  |
| S12 | Isotope effects on selected bond distances and mean-square vibration amplitudes in pyridine and <b>bpeb</b> -derivative complexes . . . . . | S8  |
| S13 | NMR isotopic shifts, $r_e$ values for and isotope effects on selected bond distances in <b>sal</b> and its derivatives . . . . .            | S9  |
| S14 | Isotope effects on selected mean-square amplitudes in <b>sal</b> and its derivatives . . . . .                                              | S10 |
| S15 | Isotope effects on selected amplitude covariances with $r(\text{OH})$ in <b>sal</b> and its derivatives . . . . .                           | S11 |
| S16 | Equilibrium values for and isotope effects on selected bond angles in <b>sal</b> and its derivatives . . . . .                              | S12 |

### S1 Description of the zip file in the SI

The zip archive contains three kinds of ASCII files:

1. one text file (suffix .txt) for each compound investigated in this work. The names of these files reflect the compound under consideration.  
The .txt file contains a description of the computational models for each calculation of the force field and the NMR properties. Additionally, for each force-field calculation, the Cartesian geometry (all coordinates in Å), the ground-state energy (in Hartree) and the zero-point vibration energy (in kJ/mol) are given. For each calculation of NMR properties, the corresponding ground-state energy is given.
2. one file (suffix .xyz) for each force-field calculation with the corresponding equilibrium geometry in xyz format. The names of these files reflect the compound in question; for pyridine in addition the basis set and solvent.
3. one file (suffix .molden) for each force-field calculation with the corresponding difference-dedicated vibration modes in Molden [S1] format. Instead of the vibration frequencies, the weight factors  $\kappa_i$  are given, all intensities are put to one.

## S2 Isotope effects on geometry parameters and NMR isotopic shifts

### S2.1 Molecules in Sec. 3.1

**Table S1:** NMR isotopic shifts for a single H/D substitution in benzene calculated at various levels of theory. Calculations done with  $\omega$ B97X-D/pc-2 force field. All values calculated for acetone solution and given in ppb.

| method          | basis set       | C1     | C2     | C3    | C4    | MSgD  | RMS  |
|-----------------|-----------------|--------|--------|-------|-------|-------|------|
| DD-VPT2 [S2]    | $\omega$ B97X-D | -317.9 | -141.7 | -9.9  | -5.6  | -21.5 | 26.9 |
|                 | B3LYP           | -355.2 | -147.0 | -11.9 | -3.4  | -36.4 | 46.6 |
| loc-VPT2        | $\omega$ B97X-D | -282.3 | -135.2 | -8.7  | -19.5 | -7.1  | 14.0 |
|                 | B3LYP           | -320.8 | -140.5 | -10.4 | -17.3 | -22.2 | 27.7 |
| LMZL            | $\omega$ B97X-D | -230.5 | -130.1 | -8.2  | -21.4 | 12.1  | 32.3 |
|                 | B3LYP           | -243.0 | -137.8 | -9.5  | -18.4 | 4.9   | 27.8 |
| LMZL+cent       | $\omega$ B97X-D | -273.9 | -130.8 | -8.7  | -20.2 | -2.8  | 12.7 |
|                 | B3LYP           | -293.0 | -138.9 | -10.0 | -17.2 | -12.3 | 17.1 |
| Experiment [S3] |                 | -283   | -111   | -11   |       |       |      |

**Table S2:** NMR isotopic shifts for a single H/D substitution in cyclohexane calculated at various levels of theory. Calculations done with the  $\omega$ B97X-D XC functional and a pc-2 basis set for the force fields and a pcS-2 basis set for the NMR calculations. All values given in ppb.

| method                                          | basis set       | C1     | C2     | C3    | C4   | H2    |      | MSgD  | RMS  |
|-------------------------------------------------|-----------------|--------|--------|-------|------|-------|------|-------|------|
|                                                 |                 |        |        |       |      | ax    | eq   |       |      |
| H/D substitution at axial site                  |                 |        |        |       |      |       |      |       |      |
| DD-VPT2 [S2]                                    | $\omega$ B97X-D | -494.4 | -102.4 | -12.0 | 1.4  | -6.5  | -7.4 | -17.8 | 30.3 |
|                                                 | B3LYP           | -525.6 | -105.4 | -8.4  | 3.0  | -7.0  | -7.6 | -28.0 | 48.4 |
| loc-VPT2                                        | $\omega$ B97X-D | -510.9 | -99.3  | -20.9 | 0.2  | -5.6  | -7.1 | -25.2 | 39.8 |
|                                                 | B3LYP           | -544.2 | -102.9 | -17.2 | 1.5  | -6.1  | -7.3 | -36.2 | 58.9 |
| LMZL                                            | $\omega$ B97X-D | -399.1 | -90.6  | -16.4 | 0.8  | -5.4  | -6.1 | 16.5  | 25.3 |
|                                                 | B3LYP           | -429.8 | -96.6  | -13.1 | 1.5  | -5.8  | -6.4 | 5.3   | 7.3  |
|                                                 | B3LYP [S4]      | -403.7 | -88.6  | -14.3 | -3.0 | -5.6  | -6.4 | 16.3  | 23.0 |
| LMZL+cent                                       | $\omega$ B97X-D | -500.8 | -100.4 | -20.0 | 0.7  | -5.7  | -6.9 | -21.9 | 34.0 |
|                                                 | B3LYP           | -537.0 | -106.8 | -16.3 | 1.4  | -6.1  | -7.3 | -34.9 | 54.9 |
| experiment                                      | Ref. [S5]       | 444.9  |        |       |      |       |      |       |      |
|                                                 | Ref. [S6]       |        |        |       |      | -6.9  | -7.5 |       |      |
| ( <i>t</i> -Bu-C <sub>6</sub> H <sub>12</sub> ) | Ref. [S5]       | 442.2  | 98.6   | 14.7  |      |       |      |       |      |
| H/D substitution at equatorial site             |                 |        |        |       |      |       |      |       |      |
| DD-VPT2 [S2]                                    | $\omega$ B97X-D | -439.6 | -114.7 | -40.0 | 0.2  | -11.2 | -7.9 | -19.3 | 27.7 |
|                                                 | B3LYP           | -478.8 | -123.6 | -43.6 | -0.2 | -11.5 | -8.1 | -36.5 | 51.0 |
| loc-VPT2                                        | $\omega$ B97X-D | -439.4 | -118.5 | -30.3 | -0.1 | -11.6 | -8.4 | -17.3 | 28.4 |
|                                                 | B3LYP           | -480.3 | -128.0 | -33.6 | -0.8 | -12.0 | -8.6 | -35.2 | 52.4 |
| LMZL                                            | $\omega$ B97X-D | -327.9 | -105.9 | -29.3 | -0.4 | -9.8  | -7.1 | 24.4  | 37.6 |
|                                                 | B3LYP           | -373.2 | -115.2 | -33.0 | -1.3 | -10.0 | -7.3 | 5.0   | 12.5 |
|                                                 | B3LYP [S4]      | -354.2 | -114.7 | -27.1 | -2.6 | -9.9  | -8.0 | 13.4  | 23.4 |
| LMZL+cent                                       | $\omega$ B97X-D | -418.3 | -116.3 | -30.8 | 0.0  | -11.2 | -8.0 | -9.7  | 16.5 |
|                                                 | B3LYP           | -470.2 | -126.4 | -34.7 | -1.0 | -11.4 | -8.2 | -31.7 | 46.4 |
| experiment                                      | Ref. [S5]       | 396.4  |        |       |      |       |      |       |      |
|                                                 | Ref. [S6]       |        |        |       |      | -10.4 | -7.5 |       |      |
| ( <i>t</i> -Bu-C <sub>6</sub> H <sub>12</sub> ) | Ref. [S5]       | 392.4  | 106.2  | 37.7  |      |       |      |       |      |

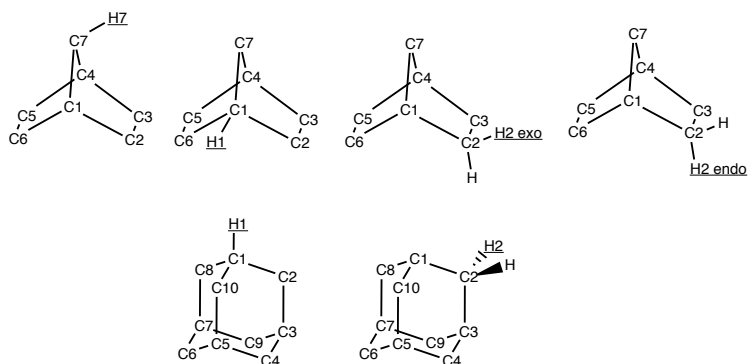

**Figure S1:** Atom numbering for norbornane and adamantane. The H/D substitution sites are underlined.

**Table S3:** NMR isotopic shifts for a single H/D substitution in norbornane calculated at various levels of theory. Calculations done with the  $\omega$ B97X-D XC functional and a pc-2 basis set for the force fields and a pcS-2 basis set for the NMR calculations. DD-VPT2 values from Ref. [S2], experimental values from Ref. [S7]. All values given in ppb.

| substitution | method/<br>condition | C1     | C2     | C3     | C4     | C5   | C6     | C7     |
|--------------|----------------------|--------|--------|--------|--------|------|--------|--------|
| H7           | DD-VPT2              | -100.6 | -31.9  | -31.9  | -100.6 | 2.0  | 2.0    | -416.0 |
|              | loc-VPT2             | -91.2  | -30.8  | -30.8  | -91.2  | 14.5 | 14.5   | -404.1 |
|              | expt (25°C)          | -88.5  | -26.2  | -26.2  | -88.5  | 6.6  | 6.6    | -361.1 |
| H1           | DD-VPT2              | -442.9 | -119.6 | -8.4   | 40.6   | -8.4 | -119.6 | -108.4 |
|              | loc-VPT2             | -423.5 | -111.2 | -7.7   | 39.5   | -7.7 | -111.2 | -104.9 |
|              | expt (25°C)          | -376.4 | -103.6 | -7.3   | 36.7   | -7.3 | -103.6 | -91.2  |
| H2 exo       | DD-VPT2              | -97.9  | -418.1 | -135.6 | -12.9  | 7.0  | -54.2  | -18.0  |
|              | loc-VPT2             | -95.5  | -399.9 | -117.6 | -11.9  | -3.3 | -28.0  | -19.1  |
|              | expt (25°C)          | -87.4  | -364.9 | -120.2 | -14.6  |      | -43.7  | -12.3  |
| H2 endo      | DD-VPT2              | -111.8 | -442.2 | -100.4 | 10.6   | -2.2 | -52.1  | -2.2   |
|              | loc-VPT2             | -94.7  | -434.7 | -98.8  | 9.5    | -0.7 | -82.3  | 17.1   |
|              | expt (25°C)          | -94.3  | -384.0 | -89.1  | 6.7    |      | -50.8  | 5.2    |

**Table S4:** NMR isotopic shifts for a single H/D substitution in adamantane calculated at various levels of theory. Calculations done with the  $\omega$ B97X-D XC functional and a pc-2 basis set for the force fields and a pcS-2 basis set for the NMR calculations. DD-VPT2 values from Ref. [S2], experimental values from Ref. [S8]. All values given in ppb.

| substitution | method/<br>condition | C1     | C2     | C4    | C5    | C6   | C7    | C8     |
|--------------|----------------------|--------|--------|-------|-------|------|-------|--------|
| H1           | DD-VPT2              | -595.9 | -140.8 | 2.2   | -32.7 | 2.2  | -32.7 | -140.9 |
|              | loc-VPT2             | -596.9 | -139.7 | -1.2  | -28.0 | -1.2 | -28.0 | -139.6 |
|              | expt (25°C)          | -514   | -127   |       | -32   |      | -32   | -127   |
| H2           | DD-VPT2              | -105.9 | -500.4 | -13.5 | 0.5   | -3.7 | -9.1  | -41.3  |
|              | loc-VPT2             | -100.9 | -510.9 | -27.3 | -4.0  | -1.5 | -5.1  | -18.5  |
|              | expt (25°C)          | -100   | -440   | -13   |       | -4   | -3    | -31    |

**Table S5:** Isotope effects on selected bond distances in the compounds considered in Sec. 3.1. Calculations done at the  $\omega$ B97X-D/pc-2 level of theory. The notations s, g, and a indicate bonds in syn, gauche, and anti conformation to the C-H bond, respectively. All values given in  $\mu\text{\AA}$ .

|                      | $r(\underline{\text{CH}})$ |       | $r(\text{CC}')$ |       | $r(\text{CH}')$ |       | $r(\text{C}'\text{C}'')$ |       |   | $r(\text{C}'\text{H}'')$ |       |   |
|----------------------|----------------------------|-------|-----------------|-------|-----------------|-------|--------------------------|-------|---|--------------------------|-------|---|
|                      | $r_z$                      | $r_g$ | $r_z$           | $r_g$ | $r_z$           | $r_g$ | $r_z$                    | $r_g$ |   | $r_z$                    | $r_g$ |   |
| <b>Pyridine</b>      | -989                       | -5437 | -147            | -182  |                 |       | -32                      | 4     | a | -1                       | 3     | s |
| <b>Benzene (H/D)</b> | -769                       | -5369 | -140            | -168  |                 |       | -30                      | 2     | a | 7                        | 2     | s |
| <b>Cyclohexane</b>   |                            |       |                 |       |                 |       |                          |       |   |                          |       |   |
| axial                | -1740                      | -5987 | -85             | -147  | 338             | 15    | 11                       | 20    | g | 17                       | 20    | g |
|                      |                            |       |                 |       |                 |       |                          |       |   | -31                      | -40   | a |
| equatorial           | -1563                      | -5851 | -121            | -182  | 361             | 18    | -82                      | -54   | a | 4                        | 17    | g |
|                      |                            |       |                 |       |                 |       |                          |       |   | 21                       | 21    | g |
| <b>Norbornane</b>    |                            |       |                 |       |                 |       |                          |       |   |                          |       |   |
| H7                   | -1582                      | -5783 | -166            | -198  | 197             | -5    | 12                       | 18    | g | 7                        | 12    | g |
|                      |                            |       |                 |       |                 |       | -63                      | -51   | a |                          |       |   |
| H1                   | -1825                      | -5793 | -169            | -181  |                 |       | -16                      | -5    | a | 7                        | 10    | g |
|                      |                            |       | -191            | -207  |                 |       | -30                      | -11   | a | 2                        | 8     | g |
|                      |                            |       |                 |       |                 |       |                          |       |   | 10                       | 16    | g |
| H2 exo               | -1433                      | -5777 | -104            | -167  | 365             | 2     | -75                      | -59   | a | 6                        | 7     | g |
|                      |                            |       | -95             | -184  |                 |       | 28                       | 24    | g | 23                       | -7    | g |
|                      |                            |       |                 |       |                 |       | -32                      | -10   | g | 47                       | 19    | s |
| H2 endo              | -1424                      | -5761 | -187            | -251  | 376             | 12    | 19                       | 31    | g | 13                       | 18    | g |
|                      |                            |       | -72             | -157  |                 |       | -49                      | -45   | a | 39                       | 20    | s |
|                      |                            |       |                 |       |                 |       | -15                      | 14    | g | 13                       | -12   | g |
| <b>Adamantane</b>    |                            |       |                 |       |                 |       |                          |       |   |                          |       |   |
| H1                   | -2396                      | -6130 | -146            | -161  |                 |       | -59                      | -54   | a | 13                       | 14    | g |
| H2                   | -1877                      | -6002 | -137            | -173  | 255             | 10    | 8                        | 8     | g | 18                       | 19    | g |
|                      |                            |       |                 |       |                 |       | -90                      | -86   | a |                          |       |   |
| <b>Methane</b>       | -1920                      | -5704 |                 |       | -855            | 103   |                          |       |   |                          |       |   |

**Table S6:** Isotope effects on selected mean-square vibration amplitudes in the compounds considered in Sec. 3.1. Calculations done at the  $\omega$ B97X-D/pc-2 level of theory. The letters s, g, and a indicate bonds in syn, gauche, and anti conformation, respectively, to the C–H bond. All values given in  $\text{m}\text{\AA}^2$  or  $\text{dgr}^2$ , respectively.

|                    | $r(\text{CH})$ | $r(\text{CC}')$ | $r(\text{CH}')$ | $r(\text{C}'\text{C}'')$      | $r(\text{C}'\text{H}'')$            | $\varphi_{\text{az}}$ | $\varphi_{\text{alt}}$ |
|--------------------|----------------|-----------------|-----------------|-------------------------------|-------------------------------------|-----------------------|------------------------|
| <b>Pyridine</b>    | –1525          | –4.17           |                 | –0.85 a                       | –0.0073 s                           | –9.8                  | –12.9                  |
| <b>Benzene</b>     | –1512          | –3.86           |                 | –0.90 a                       | –0.0058 s                           | –10.3                 | –13.6                  |
| <b>Cyclohexane</b> |                |                 |                 |                               |                                     |                       |                        |
| axial              | –1584          | –2.87           | –0.267          | –0.03 g                       | –0.0079 g<br>–0.0136 a              | –10.5                 | –11.5                  |
| equatorial         | –1567          | –3.49           | –0.363          | –2.52 a                       | –0.0093 g<br>–0.0187 g              | –10.7                 | –11.5                  |
| <b>Norbornane</b>  |                |                 |                 |                               |                                     |                       |                        |
| H7                 | –1563          | –4.70           | –0.306          | –0.17 g<br>–1.76 a            | –0.0060 g                           | –11.4                 | –11.3                  |
| H1                 | –1553          | –4.90<br>–4.52  |                 | –1.58 a<br>–1.78 a            | –0.0086 g<br>–0.0073 g<br>–0.0172 g | –10.9                 | –11.2                  |
| H2 exo             | –1560          | –3.86<br>–4.26  | –0.343          | –1.49 a<br>–0.26 g<br>–0.66 g | –0.0029 g<br>–0.0036 g<br>–0.0125 s | –11.0                 | –11.5                  |
| H2 endo            | –1563          | –4.43<br>–3.30  | –0.272          | –0.03 g<br>–2.38 a<br>–0.66 g | –0.0160 g<br>–0.0117 s<br>–0.0038 g | –10.8                 | –11.7                  |
| <b>Adamantane</b>  |                |                 |                 |                               |                                     |                       |                        |
| H1                 | –1579          | –3.22           |                 | –2.68 a                       | –0.0120 g                           | –10.6                 | –10.4                  |
| H2                 | –1578          | –3.72           | –0.290          | –0.08 g<br>–2.11 a            | –0.0106 g                           | –10.7                 | –11.4                  |

**Table S7:** Isotope effects on the amplitude covariances with  $r(\text{CH})$  in the compounds considered in Sec. 3.1. Calculations done at the  $\omega\text{B97X-D/pc-2}$  level of theory. The letters s, g, and a indicate bonds in syn, gauche, and anti conformation, respectively, to the C–H bond. All values given in  $\text{m}\text{\AA}^2$  or  $\text{dgr}^2$ , respectively.

|                    | $r(\text{CC}')$ | $r(\text{CH}')$ | $r(\text{C}'\text{C}'')$ |   | $r(\text{C}'\text{H}'')$ |   |
|--------------------|-----------------|-----------------|--------------------------|---|--------------------------|---|
| <b>Pyridine</b>    | –35.8           |                 | –7.18                    | a | 0.17                     | s |
| <b>Benzene</b>     | –34.7           |                 | –7.44                    | a | 0.44                     | s |
| <b>Cyclohexane</b> |                 |                 |                          |   |                          |   |
| axial              | –24.3           | –5.91           | 0.78                     | g | 1.14                     | g |
|                    |                 |                 |                          |   | –1.93                    | a |
| equatorial         | –27.4           | –6.45           | –7.25                    | a | 1.03                     | g |
|                    |                 |                 |                          |   | 1.31                     | g |
| <b>Norbornane</b>  |                 |                 |                          |   |                          |   |
| H1                 | –31.2           | –8.05           | 1.62                     | g | 0.62                     | g |
|                    |                 |                 | –5.14                    | a |                          |   |
| H7                 | –33.7           |                 | –3.63                    | a | 0.45                     | g |
|                    | –32.5           |                 | –4.64                    | a | 0.33                     | g |
|                    |                 |                 |                          |   | 1.29                     | g |
| H2 exo             | –28.8           | –6.82           | –5.48                    | a | 0.31                     | g |
|                    | –31.4           |                 | 1.82                     | g | –1.09                    | g |
|                    |                 |                 | –2.44                    | g | 2.13                     | s |
| H2 endo            | –27.8           | –6.85           | 0.12                     | g | 1.32                     | g |
|                    | –29.0           |                 | –6.99                    | a | 2.57                     | s |
|                    |                 |                 | –3.66                    | g | –1.13                    | g |
| <b>Adamantane</b>  |                 |                 |                          |   |                          |   |
| H1                 | –26.2           |                 | –7.40                    | a | 1.05                     | g |
| H2                 | –26.8           | –6.62           | 1.43                     | g | 1.16                     | g |
|                    |                 |                 | –7.51                    | a |                          |   |

## S2.2 Molecules in Sec. 3.2

**Table S8:** NMR isotopic shifts for a H/D substitution at H2 in pyridine and **bpeb**-derivative complexes calculated at various levels of theory. See Sec. 4 of the main text for computational details. All values given in ppb.

| method/<br>condition | basis set   | C2     | C3     | C4   | C5   | C6    |
|----------------------|-------------|--------|--------|------|------|-------|
| <b>Pyridine</b>      | DD-VPT2     | −386.1 | −168.4 | 3.2  | 20.7 | −8.4  |
|                      | loc-VPT2    | −366.1 | −164.2 | 4.1  | 2.8  | −19.4 |
|                      | expt (25°C) | −341.3 | −140.4 |      | 14.1 | −14.5 |
|                      | expt (0 K)  | −367.1 | −166.4 |      | 24.2 | −26.0 |
| <b>bpeb-1a</b>       | DD-VPT2     | −377.7 | −170.6 | 25.9 | 10.3 | −32.1 |
|                      | loc-VPT2    | −338.7 | −159.7 | 20.6 | −3.4 | −26.9 |
|                      | expt (25°C) | −334.2 | −144.9 | 23.7 |      | −27.8 |
|                      | expt (0 K)  | −369.7 | −175.4 | 13.8 |      | −40.5 |
| <b>bpeb-1b</b>       | DD-VPT2     | −375.9 | −166.4 | 16.3 | 9.4  | −21.1 |
|                      | loc-VPT2    | −333.4 | −153.1 | 19.0 | −5.0 | −24.2 |
|                      | expt (25°C) | −328.4 | −140.7 | 21.9 |      | −27.0 |
|                      | expt (0 K)  | −371.5 | −184.5 | 26.6 |      | −36.9 |
| <b>bpeb-1c</b>       | DD-VPT2     | −358.0 | −167.1 | 26.1 | 4.0  | −24.2 |
|                      | loc-VPT2    | −326.3 | −153.2 | 24.5 | −4.7 | −16.1 |
|                      | expt (25°C) | −322.1 | −145.2 | 21.4 |      | −20.3 |
|                      | expt (0 K)  | −342.9 | −190.4 | 30.3 |      | −32.3 |
| <b>bpeb-1d</b>       | DD-VPT2     | −353.5 | −160.1 | 17.1 | 12.7 | −21.6 |
|                      | loc-VPT2    | −323.7 | −144.7 | 20.5 | −3.8 | −14.1 |
|                      | expt (25°C) | −322.4 | −143.4 | 15.6 |      | −18.1 |
|                      | expt (0 K)  | −344.3 | −183.0 | 28.5 |      | 0.6   |
| <b>bpeb-2</b>        | DD-VPT2     | −339.3 | −173.3 | 23.5 | −6.9 | −39.0 |
|                      | loc-VPT2    | −313.1 | −166.7 | 17.2 | −7.5 | −25.0 |
|                      | expt (25°C) | −315.3 | −138.4 | 23.2 |      | −24.8 |
|                      | expt (0 K)  | −343.6 | −177.7 | 11.2 |      | −43.3 |

**Table S9:** Isotope effects on selected bond distances in pyridine and **bpeb**-derivative complexes calculated at various levels of theory. See Sec. 4 of the main text for computational details. All values given in  $\mu\text{\AA}$ .

|                 | $r(\text{CH})$ |       | $r(\text{CC}')$ |       | $r(\text{CN}')$ |       | $r(\text{C}'\text{C}'')$ |       | $r(\text{C}'\text{H}'')$ |       | $r(\text{N}'\text{C}'')$ |       | $r(\text{N}'\text{X}'')$ |       |
|-----------------|----------------|-------|-----------------|-------|-----------------|-------|--------------------------|-------|--------------------------|-------|--------------------------|-------|--------------------------|-------|
|                 | $r_z$          | $r_g$ | $r_z$           | $r_g$ | $r_z$           | $r_g$ | $r_z$                    | $r_g$ | $r_z$                    | $r_g$ | $r_z$                    | $r_g$ | $r_z$                    | $r_g$ |
| <b>Pyridine</b> | −1126          | −5558 | −143            | −177  | −44             | −74   | −39                      | −3    | −9                       | −5    | −17                      | 1     |                          |       |
| <b>bpeb-1a</b>  | −1144          | −5571 | −164            | −206  | −129            | −181  | 66                       | 23    | 23                       | 0     | 0                        | −31   | −44                      | −54   |
| <b>bpeb-1b</b>  | −1126          | −5540 | −174            | −211  | −104            | −154  | 53                       | 17    | 28                       | 1     | −11                      | −39   | 373                      | 363   |
| <b>bpeb-1c</b>  | −1131          | −5521 | −126            | −162  | −120            | −169  | 22                       | −13   | 49                       | 16    | −11                      | −38   | 366                      | 357   |
| <b>bpeb-1d</b>  | −1201          | −5586 | −103            | −138  | −138            | −184  | −25                      | −51   | 45                       | 7     | 7                        | −13   | 274                      | 265   |
| <b>bpeb-2</b>   | −1173          | −5580 | −122            | −162  | −117            | −171  | 19                       | −26   | 14                       | −10   | 21                       | −10   | −174                     | −181  |

**Table S10:** Isotope effects on the mean-square vibration amplitudes in pyridine and **bpeb**-derivative complexes. See Sec. 4 of the main text for computational details. All values given in  $\text{m}\text{\AA}^2$  or  $\text{dgr}^2$ , respectively.

|                 | $r(\text{CH})$ | $r(\text{CC}')$ | $r(\text{CN}')$ | $r(\text{C}'\text{C}'')$ | $r(\text{C}'\text{H}'')$ | $r(\text{N}'\text{C}'')$ | $r(\text{N}'\text{X}'')$ |
|-----------------|----------------|-----------------|-----------------|--------------------------|--------------------------|--------------------------|--------------------------|
| <b>Pyridine</b> | −1517          | −4.22           | −1.94           | −0.85                    | −0.00489                 | −0.83                    |                          |
| <b>bpeb-1a</b>  | −1497          | −4.03           | −2.67           | −0.82                    | −0.00313                 | −1.17                    | −2.94                    |
| <b>bpeb-1b</b>  | −1498          | −4.23           | −2.70           | −1.11                    | −0.00335                 | −1.16                    | −2.09                    |
| <b>bpeb-1c</b>  | −1498          | −4.12           | −2.70           | −1.20                    | −0.00483                 | −1.18                    | −1.72                    |
| <b>bpeb-1d</b>  | −1500          | −3.93           | −2.84           | −1.52                    | −0.00503                 | −1.16                    | −1.40                    |
| <b>bpeb-2</b>   | −1496          | −4.09           | −2.71           | −0.80                    | −0.00401                 | −1.15                    | −2.98                    |

**Table S11:** Isotope effects on the amplitude covariances with  $r(\text{CH})$  in pyridine and **bpeb**-derivative complexes calculated at various levels of theory. See Sec. 4 of the main text for computational details. All values given in  $\text{m}\text{\AA}^2$  or  $\text{dgr}^2$ , respectively.

|                 | $r(\text{CC}')$ | $r(\text{CN}')$ | $r(\text{C}'\text{C}'')$ | $r(\text{C}'\text{H}'')$ | $r(\text{N}'\text{C}'')$ | $r(\text{N}'\text{X}'')$ |
|-----------------|-----------------|-----------------|--------------------------|--------------------------|--------------------------|--------------------------|
| <b>Pyridine</b> | −35.8           | −26.5           | −7.22                    | −0.136                   | −6.14                    |                          |
| <b>bpeb-1a</b>  | −36.5           | −29.8           | −6.92                    | −0.271                   | −7.13                    | 3.98                     |
| <b>bpeb-1b</b>  | −36.4           | −29.9           | −7.74                    | −0.238                   | −6.95                    | 3.61                     |
| <b>bpeb-1c</b>  | −35.5           | −29.7           | −7.95                    | −0.169                   | −6.99                    | 3.49                     |
| <b>bpeb-1d</b>  | −34.6           | −30.0           | −8.89                    | −0.064                   | −6.76                    | 3.32                     |
| <b>bpeb-2</b>   | −36.8           | −29.5           | −6.91                    | −0.354                   | −7.21                    | 4.42                     |

**Table S12:** Isotope effects on selected bond distances and mean-square vibration amplitudes in pyridine and **bpeb**-derivative complexes calculated at various levels of theory. See Sec. 4 of the main text for computational details. All values given in  $\text{m}\text{\AA}^2$  or  $\text{dgr}^2$ , respectively.

|                 |          | Geometry       |       | Amplitude (mean square) |       |                       |       |                        |       |
|-----------------|----------|----------------|-------|-------------------------|-------|-----------------------|-------|------------------------|-------|
|                 |          | $r(\text{CH})$ |       | $r(\text{CH})$          |       | $\varphi_{\text{az}}$ |       | $\varphi_{\text{alt}}$ |       |
|                 |          | $r_z$          | $r_g$ | all-H                   | IE    | all-H                 | IE    | all-H                  | IE    |
| <b>Pyridine</b> | DD-VPT2  | −1126          | −5558 | 5671                    | −1517 | 38.7                  | −9.7  | 83.5                   | −12.8 |
|                 | loc-VPT2 | −1499          | −5850 | 5440                    | −1592 | 35.3                  | −10.3 | 54.3                   | −15.9 |
| <b>bpeb-1a</b>  | DD-VPT2  | −1144          | −5571 | 5589                    | −1497 | 39.1                  | −9.8  | 82.8                   | −13.0 |
|                 | loc-VPT2 | −1467          | −5842 | 5367                    | −1570 | 35.5                  | −10.4 | 54.8                   | −16.0 |
| <b>bpeb-1b</b>  | DD-VPT2  | −1126          | −5540 | 5592                    | −1498 | 39.0                  | −9.8  | 82.8                   | −13.0 |
|                 | loc-VPT2 | −1439          | −5812 | 5369                    | −1571 | 35.5                  | −10.4 | 54.8                   | −16.0 |
| <b>bpeb-1c</b>  | DD-VPT2  | −1131          | −5521 | 5592                    | −1498 | 38.8                  | −9.7  | 83.1                   | −12.8 |
|                 | loc-VPT2 | −1453          | −5801 | 5370                    | −1571 | 35.3                  | −10.3 | 54.5                   | −15.9 |
| <b>bpeb-1d</b>  | DD-VPT2  | −1201          | −5586 | 5603                    | −1500 | 38.8                  | −9.7  | 83.9                   | −12.8 |
|                 | loc-VPT2 | −1528          | −5873 | 5380                    | −1574 | 35.3                  | −10.3 | 54.4                   | −15.9 |
| <b>bpeb-2</b>   | DD-VPT2  | −1173          | −5580 | 5587                    | −1496 | 39.2                  | −9.8  | 82.4                   | −12.9 |
|                 | loc-VPT2 | −1497          | −5861 | 5364                    | −1570 | 35.7                  | −10.4 | 54.4                   | −15.9 |



## S2.3 Molecules in Sec. 3.3

**Table S13:** NMR isotopic shifts  $^2\Delta(\text{C2})$ , equilibrium values for and isotope effects on selected bond distances in **sal** and **sal-1** to **sal-12** as well as the hypothetical conformer **sal-out**. See Sec. 4 of the main text for computational details. NMR isotopic shifts given in ppb,  $r_e$  values in Å, and  $^n\Delta r$  values in  $\mu\text{Å}$ , respectively.

|         |          | $^2\Delta(\text{C2})$ | $r(\text{O-H})$ |                |                | $r(\text{O}, \text{O})$ |                |                | $r(\text{O} \cdots \text{H})$ |                |                |
|---------|----------|-----------------------|-----------------|----------------|----------------|-------------------------|----------------|----------------|-------------------------------|----------------|----------------|
|         |          |                       | $r_e$           | $^n\Delta r_z$ | $^n\Delta r_g$ | $r_e$                   | $^n\Delta r_z$ | $^n\Delta r_g$ | $r_e$                         | $^n\Delta r_z$ | $^n\Delta r_g$ |
| sal     | DD-VPT2  | -205.52               | 0.9764          | -991           | -5993          | 2.6355                  | 2530           | 2527           | 1.7688                        | 2751           | 148            |
|         | loc-VPT2 | -140.60               |                 | -1015          | -6039          |                         | 0              | 0              |                               | -99            | -2637          |
|         | exp      | -227                  |                 |                |                |                         |                |                |                               |                |                |
| sal-1   | DD-VPT2  | -120.24               | 0.9758          | -275           | -5309          | 2.6317                  | -1987          | -1992          | 1.7723                        | -2709          | -5314          |
|         | loc-VPT2 | -126.62               |                 | -558           | -5617          |                         | 0              | 0              |                               | -96            | -2636          |
|         | exp      | -226                  |                 |                |                |                         |                |                |                               |                |                |
| sal-2   | DD-VPT2  | -598.14               | 0.9789          | -4084          | -8942          | 2.5654                  | 14438          | 14434          | 1.6956                        | 22871          | 20244          |
|         | loc-VPT2 | -276.17               |                 | -3200          | -8070          |                         | 0              | 0              |                               | 4383           | 1820           |
|         | exp      | -303                  |                 |                |                |                         |                |                |                               |                |                |
| sal-3a  | DD-VPT2  | -278.63               | 0.9850          | -2321          | -6909          | 2.5766                  | 4382           | 4378           | 1.6886                        | 6717           | 4189           |
|         | loc-VPT2 | -180.79               |                 | -2124          | -6728          |                         | 0              | 0              |                               | 1491           | -974           |
|         | exp      | -304.00               |                 |                |                |                         |                |                |                               |                |                |
| sal-3b  | DD-VPT2  | -334.26               | 0.9847          | -2652          | -7277          | 2.5891                  | 7166           | 7163           | 1.7014                        | 10995          | 8462           |
|         | loc-VPT2 | -201.59               |                 | -2252          | -6908          |                         | 0              | 0              |                               | 2212           | -267           |
|         | exp      | -332                  |                 |                |                |                         |                |                |                               |                |                |
| sal-4   | DD-VPT2  | -163.48               | 0.9796          | -1132          | -5930          | 2.6238                  | -1077          | -1082          | 1.7472                        | -759           | -3306          |
|         | loc-VPT2 | -157.64               |                 | -1324          | -6148          |                         | 0              | 0              |                               | 593            | -1889          |
|         | exp      | -245.00               |                 |                |                |                         |                |                |                               |                |                |
| sal-5   | DD-VPT2  | -310.75               | 0.9934          | -3571          | -7899          | 2.5419                  | 4946           | 4944           | 1.6357                        | 8596           | 6106           |
|         | loc-VPT2 | -210.36               |                 | -3185          | -7540          |                         | 0              | 0              |                               | 2648           | 206            |
|         | exp      | -420                  |                 |                |                |                         |                |                |                               |                |                |
| sal-6   | DD-VPT2  | -399.35               | 0.9798          | -2821          | -7594          | 2.5851                  | 9224           | 9220           | 1.7066                        | 14362          | 11772          |
|         | loc-VPT2 | -216.98               |                 | -2383          | -7183          |                         | 0              | 0              |                               | 2919           | 388            |
|         | exp      | -290                  |                 |                |                |                         |                |                |                               |                |                |
| sal-7   | DD-VPT2  | -114.66               | 0.9819          | -1042          | -5784          | 2.6006                  | -635           | -636           | 1.7237                        | -1181          | -3725          |
|         | loc-VPT2 | -136.43               |                 | -1299          | -6066          |                         | 0              | 0              |                               | 84             | -2404          |
|         | exp      | -210                  |                 |                |                |                         |                |                |                               |                |                |
| sal-8   | DD-VPT2  | -198.97               | 0.9732          | -761           | -5940          | 2.6578                  | 4537           | 4534           | 1.7940                        | 5689           | 3029           |
|         | loc-VPT2 | -136.44               |                 | -765           | -5980          |                         | 0              | 0              |                               | 323            | -2282          |
|         | exp      | -170                  |                 |                |                |                         |                |                |                               |                |                |
| sal-9   | DD-VPT2  | -555.87               | 0.9832          | -4333          | -9027          | 2.5451                  | 10182          | 10179          | 1.6684                        | 18021          | 15430          |
|         | loc-VPT2 | -285.44               |                 | -3520          | -8222          |                         | 0              | 0              |                               | 4506           | 1988           |
|         | exp      | -390                  |                 |                |                |                         |                |                |                               |                |                |
| sal-10  | DD-VPT2  | -596.21               | 0.9904          | -4707          | -9129          | 2.5151                  | 9367           | 9364           | 1.6160                        | 16467          | 13900          |
|         | loc-VPT2 | -298.13               |                 | -3761          | -8209          |                         | 0              | 0              |                               | 4461           | 1955           |
|         | exp      | -640                  |                 |                |                |                         |                |                |                               |                |                |
| sal-11  | DD-VPT2  | -497.16               | 0.9960          | -4559          | -8963          | 2.4805                  | 4328           | 4327           | 1.5790                        | 12131          | 9556           |
|         | loc-VPT2 | -301.37               |                 | -3946          | -8359          |                         | 0              | 0              |                               | 5999           | 3465           |
|         | exp      | -850                  |                 |                |                |                         |                |                |                               |                |                |
| sal-12  | DD-VPT2  | 73.42                 | 0.9778          | 842            | -4286          | 2.6258                  | -9244          | -9245          | 1.7675                        | -14907         | -17532         |
|         | loc-VPT2 | -69.74                |                 | 16             | -5114          |                         | 0              | 0              |                               | -2499          | -5073          |
|         | exp      | -220                  |                 |                |                |                         |                |                |                               |                |                |
| sal-out | DD-VPT2  | -71.71                | 0.9574          | 3615           | -4879          | 2.7798                  | 103            | 78             |                               |                |                |
|         | loc-VPT2 | -62.65                |                 | 3368           | -5075          |                         | 0              | 0              |                               |                |                |

**Table S14:** Isotope effects on selected mean-square amplitudes in **sal** and **sal-1** to **sal-12** as well as the hypothetical conformer **sal-out** for different methods. Calculations done at the  $\omega$ B97X-D/pc-2 level of theory. See Sec. 4 of the main text for computational details. All values in  $\text{m}\text{\AA}^2$  or  $\text{dgr}^2$ , respectively.

|                |          | $r(\text{O}-\text{H})$ |       | $r(\text{O}, \text{O})$ |       | $r(\text{O} \cdots \text{H})$ |       | $\varphi(\text{C2}-\text{O}-\text{H})$ |       | $\tau(\text{C1}-\text{C2}-\text{O}-\text{H})$ |       |
|----------------|----------|------------------------|-------|-------------------------|-------|-------------------------------|-------|----------------------------------------|-------|-----------------------------------------------|-------|
|                |          | all-H                  | IE    | all-H                   | IE    | all-H                         | IE    | all-H                                  | IE    | all-H                                         | IE    |
| <b>sal</b>     | DD-VPT2  | 5126                   | -1396 | 6433                    | -97.3 | 16292                         | -2801 | 46.6                                   | -11.5 | 90.3                                          | -24.7 |
|                | loc-VPT2 | 4957                   | -1450 | 0                       | 0     | 7794                          | -2281 | 42.1                                   | -12.3 | 80.9                                          | -23.7 |
| <b>sal-1</b>   | DD-VPT2  | 5072                   | -1381 | 6141                    | -82.7 | 15771                         | -2779 | 46.7                                   | -11.5 | 95.0                                          | -25.1 |
|                | loc-VPT2 | 4906                   | -1435 | 0                       | 0     | 7874                          | -2304 | 42.1                                   | -12.3 | 81.8                                          | -23.9 |
| <b>sal-2</b>   | DD-VPT2  | 5241                   | -1428 | 5438                    | -74.9 | 15007                         | -2792 | 46.2                                   | -11.4 | 94.8                                          | -23.8 |
|                | loc-VPT2 | 5063                   | -1481 | 0                       | 0     | 7949                          | -2326 | 41.6                                   | -12.2 | 76.9                                          | -22.5 |
| <b>sal-3a</b>  | DD-VPT2  | 5428                   | -1479 | 5774                    | -86.0 | 15524                         | -2778 | 44.9                                   | -11.0 | 87.0                                          | -21.8 |
|                | loc-VPT2 | 5236                   | -1532 | 0                       | 0     | 7791                          | -2280 | 40.4                                   | -11.8 | 71.1                                          | -20.8 |
| <b>sal-3b</b>  | DD-VPT2  | 5388                   | -1468 | 5812                    | -79.6 | 15304                         | -2718 | 44.7                                   | -11.0 | 84.4                                          | -22.1 |
|                | loc-VPT2 | 5199                   | -1521 | 0                       | 0     | 7697                          | -2252 | 40.1                                   | -11.7 | 72.4                                          | -21.2 |
| <b>sal-4</b>   | DD-VPT2  | 5209                   | -1419 | 6117                    | -88.2 | 15705                         | -2746 | 45.9                                   | -11.3 | 92.2                                          | -23.3 |
|                | loc-VPT2 | 5036                   | -1474 | 0                       | 0     | 7701                          | -2253 | 41.4                                   | -12.1 | 76.5                                          | -22.4 |
| <b>sal-5</b>   | DD-VPT2  | 5740                   | -1564 | 5297                    | -73.3 | 14835                         | -2739 | 43.3                                   | -10.5 | 81.3                                          | -20.0 |
|                | loc-VPT2 | 5522                   | -1616 | 0                       | 0     | 7794                          | -2281 | 38.6                                   | -11.3 | 76.9                                          | -22.5 |
| <b>sal-6</b>   | DD-VPT2  | 5238                   | -1427 | 5538                    | -74.7 | 14704                         | -2689 | 45.4                                   | -11.2 | 88.1                                          | -23.2 |
|                | loc-VPT2 | 5062                   | -1481 | 0                       | 0     | 7677                          | -2247 | 40.9                                   | -12.0 | 76.0                                          | -22.2 |
| <b>sal-7</b>   | DD-VPT2  | 5275                   | -1437 | 5739                    | -74.0 | 15175                         | -2731 | 45.7                                   | -11.2 | 94.0                                          | -23.0 |
|                | loc-VPT2 | 5098                   | -1492 | 0                       | 0     | 7793                          | -2280 | 41.1                                   | -12.0 | 75.1                                          | -22.0 |
| <b>sal-8</b>   | DD-VPT2  | 4987                   | -1358 | 6063                    | -78.0 | 15063                         | -2654 | 46.8                                   | -11.5 | 102.1                                         | -26.4 |
|                | loc-VPT2 | 4829                   | -1413 | 0                       | 0     | 7575                          | -2217 | 42.2                                   | -12.4 | 86.5                                          | -25.3 |
| <b>sal-9</b>   | DD-VPT2  | 5393                   | -1469 | 5358                    | -77.1 | 15277                         | -2856 | 45.7                                   | -11.2 | 94.6                                          | -22.6 |
|                | loc-VPT2 | 5200                   | -1522 | 0                       | 0     | 8079                          | -2364 | 41.1                                   | -12.0 | 72.5                                          | -21.2 |
| <b>sal-10</b>  | DD-VPT2  | 5679                   | -1546 | 5070                    | -67.3 | 14601                         | -2754 | 43.9                                   | -10.7 | 86.9                                          | -20.8 |
|                | loc-VPT2 | 5459                   | -1597 | 0                       | 0     | 7892                          | -2309 | 39.3                                   | -11.5 | 67.2                                          | -19.7 |
| <b>sal-11</b>  | DD-VPT2  | 5923                   | -1610 | 4840                    | -64.9 | 15049                         | -2919 | 43.9                                   | -10.7 | 86.6                                          | -20.2 |
|                | loc-VPT2 | 5674                   | -1660 | 0                       | 0     | 8369                          | -2449 | 39.2                                   | -11.5 | 65.3                                          | -19.1 |
| <b>sal-12</b>  | DD-VPT2  | 5164                   | -1407 | 6380                    | -96.0 | 16886                         | -2947 | 47.4                                   | -11.7 | 93.5                                          | -25.2 |
|                | loc-VPT2 | 4991                   | -1461 | 0                       | 0     | 8179                          | -2393 | 42.9                                   | -12.5 | 82.3                                          | -24.1 |
| <b>sal-out</b> | DD-VPT2  | 4557                   | -1240 | 7985                    | -96.3 |                               |       | 54.0                                   | -13.6 | 181.7                                         | -45.6 |
|                | loc-VPT2 | 4416                   | -1292 | 0                       | 0     |                               |       | 49.4                                   | -14.5 | 167.5                                         | -49.0 |

**Table S15:** Isotope effects on selected amplitude covariances with  $r(\text{OH})$  in **sal** and **sal-1** to **sal-12** as well as the hypothetical conformer **sal-out** for different methods. Calculations done at the  $\omega\text{B97X-D/pc-2}$  level of theory. See Sec. 4 of the main text for computational details. All values given in  $\text{m}\text{\AA}^2$  or  $\text{dgr}^2$ , respectively.

|                |          | $r(\text{O}, \text{O})$ |       | $r(\text{O} \cdots \text{H})$ |      | $\varphi(\text{C2}-\text{O}-\text{H})$ |      |
|----------------|----------|-------------------------|-------|-------------------------------|------|----------------------------------------|------|
|                |          | all-H                   | IE    | all-H                         | IE   | all-H                                  | IE   |
| <b>sal</b>     | DD-VPT2  | 14.0                    | 99.3  | -4626                         | 1356 | -44.4                                  | 7.2  |
|                | loc-VPT2 | 0                       | 0     | -4447                         | 1301 | -35.5                                  | 10.4 |
| <b>sal-1</b>   | DD-VPT2  | 77.3                    | 93.1  | -4456                         | 1321 | -43.8                                  | 7.0  |
|                | loc-VPT2 | 0                       | 0     | -4358                         | 1275 | -34.9                                  | 10.2 |
| <b>sal-2</b>   | DD-VPT2  | 37.0                    | 98.7  | -4752                         | 1397 | -50.5                                  | 8.9  |
|                | loc-VPT2 | 0                       | 0     | -4589                         | 1343 | -41.5                                  | 12.2 |
| <b>sal-3a</b>  | DD-VPT2  | -52.4                   | 108.1 | -5109                         | 1479 | -51.7                                  | 9.3  |
|                | loc-VPT2 | 0                       | 0     | -4826                         | 1412 | -42.9                                  | 12.5 |
| <b>sal-3b</b>  | DD-VPT2  | -29.3                   | 103.9 | -5020                         | 1457 | -48.9                                  | 8.5  |
|                | loc-VPT2 | 0                       | 0     | -4771                         | 1396 | -40.1                                  | 11.7 |
| <b>sal-4</b>   | DD-VPT2  | 18.2                    | 100.0 | -4746                         | 1392 | -45.5                                  | 7.5  |
|                | loc-VPT2 | 0                       | 0     | -4567                         | 1336 | -36.7                                  | 10.7 |
| <b>sal-5</b>   | DD-VPT2  | -101.1                  | 114.0 | -5527                         | 1586 | -55.0                                  | 10.2 |
|                | loc-VPT2 | 0                       | 0     | -5164                         | 1511 | -46.4                                  | 13.6 |
| <b>sal-6</b>   | DD-VPT2  | 55.7                    | 97.4  | -4742                         | 1399 | -46.5                                  | 7.8  |
|                | loc-VPT2 | 0                       | 0     | -4604                         | 1347 | -37.8                                  | 11.1 |
| <b>sal-7</b>   | DD-VPT2  | 30.4                    | 98.1  | -4778                         | 1402 | -46.2                                  | 7.7  |
|                | loc-VPT2 | 0                       | 0     | -4613                         | 1350 | -37.5                                  | 11.0 |
| <b>sal-8</b>   | DD-VPT2  | 131.4                   | 88.7  | -4311                         | 1294 | -37.8                                  | 5.3  |
|                | loc-VPT2 | 0                       | 0     | -4285                         | 1254 | -29.2                                  | 8.5  |
| <b>sal-9</b>   | DD-VPT2  | -16.0                   | 104.9 | -5017                         | 1460 | -56.1                                  | 10.5 |
|                | loc-VPT2 | 0                       | 0     | -4771                         | 1396 | -47.0                                  | 13.7 |
| <b>sal-10</b>  | DD-VPT2  | -74.2                   | 110.2 | -5428                         | 1561 | -56.5                                  | 10.6 |
|                | loc-VPT2 | 0                       | 0     | -5089                         | 1489 | -47.6                                  | 13.9 |
| <b>sal-11</b>  | DD-VPT2  | -115.9                  | 116.3 | -5792                         | 1651 | -69.8                                  | 14.2 |
|                | loc-VPT2 | 0                       | 0     | -5364                         | 1570 | -59.6                                  | 17.4 |
| <b>sal-12</b>  | DD-VPT2  | -9.2                    | 100.7 | -4688                         | 1367 | -50.6                                  | 9.0  |
|                | loc-VPT2 | 0                       | 0     | -4473                         | 1309 | -41.2                                  | 12.1 |
| <b>sal-out</b> | DD-VPT2  | -272.6                  | -79.7 |                               |      | -21.2                                  | 0.6  |
|                | loc-VPT2 | 0                       | 0     |                               |      | -12.4                                  | 3.6  |

**Table S16:** Equilibrium values for and isotope effects on selected bond angles in **sal** and **sal-1** to **sal-12** as well as the hypothetic conformer **sal-out**. See Sec.4 of the paper for computational details. Equilibrium angles given in dgr, isotope effects in mdgr.

|                | $\varphi(\text{C2-O-H})$ |                     |          | $\varphi(\text{C1-C2-O})$ |                     | $\varphi(\text{C1-C7=O})$ |                     | $\varphi(\text{C2-C1-C7})$ |                     |
|----------------|--------------------------|---------------------|----------|---------------------------|---------------------|---------------------------|---------------------|----------------------------|---------------------|
|                | $\varphi_e$              | $^n\Delta\varphi_z$ |          | $\varphi_e$               | $^n\Delta\varphi_z$ | $\varphi_e$               | $^n\Delta\varphi_z$ | $\varphi_e$                | $^n\Delta\varphi_z$ |
|                |                          | DD-VPT2             | loc-VPT2 |                           |                     |                           |                     |                            |                     |
| <b>sal</b>     | 107.865                  | -88                 | -99      | 121.877                   | 4                   | 124.504                   | 28                  | 120.483                    | 51                  |
| <b>sal-1</b>   | 107.706                  | -61                 | -57      | 123.553                   | -36                 | 124.348                   | -12                 | 119.544                    | -24                 |
| <b>sal-2</b>   | 107.370                  | 240                 | 181      | 124.277                   | 231                 | 124.269                   | 87                  | 117.255                    | 179                 |
| <b>sal-3a</b>  | 107.727                  | -16                 | -34      | 120.822                   | 21                  | 123.270                   | 47                  | 120.204                    | 78                  |
| <b>sal-3b</b>  | 107.378                  | 61                  | 33       | 121.098                   | 58                  | 124.219                   | 72                  | 120.122                    | 116                 |
| <b>sal-4</b>   | 108.073                  | -67                 | -56      | 120.675                   | 9                   | 124.336                   | -33                 | 120.779                    | -20                 |
| <b>sal-5</b>   | 107.279                  | 4                   | -11      | 120.206                   | 16                  | 123.073                   | 59                  | 119.970                    | 89                  |
| <b>sal-6</b>   | 107.625                  | 126                 | 99       | 121.805                   | 125                 | 124.559                   | 69                  | 119.087                    | 125                 |
| <b>sal-7</b>   | 108.057                  | -112                | -106     | 121.798                   | -51                 | 123.606                   | 6                   | 119.709                    | 11                  |
| <b>sal-8</b>   | 108.269                  | -15                 | -33      | 120.899                   | 41                  | 124.660                   | 43                  | 121.036                    | 73                  |
| <b>sal-9</b>   | 107.171                  | 208                 | 166      | 124.360                   | 207                 | 123.974                   | 28                  | 117.191                    | 115                 |
| <b>sal-10</b>  | 107.023                  | 171                 | 139      | 122.295                   | 112                 | 124.365                   | 81                  | 117.698                    | 128                 |
| <b>sal-11</b>  | 106.222                  | 297                 | 288      | 123.781                   | 105                 | 122.914                   | -1                  | 115.982                    | 25                  |
| <b>sal-12</b>  | 107.501                  | -310                | -251     | 123.685                   | -163                | 124.116                   | -49                 | 119.490                    | -113                |
| <b>sal-out</b> | 109.702                  | -223                | -254     | 119.116                   | 11                  | 127.294                   | -2                  | 124.356                    | 0                   |

## References

- S1 Schaftenaar, G.; Noordik, J.H. Molden: a pre- and post-processing program for molecular and electronic structures. *J. Comp.-Aided Mol. Design* **2000**, *14*, 123–134. doi:10.1023/A:1008193805436.
- S2 Gräfenstein, J. Efficient calculation of NMR isotopic shifts: Difference-dedicated vibrational perturbation theory. *J. Chem. Phys.* **2019**, *151*, 244120. doi:10.1063/1.5134538.
- S3 Berger, S.; Diehl, B.W.K. Correlation between deuterium-isotope effects and  $^{13}\text{C}$ -NMR chemical-shifts in substituted benzenes. *Tetrahedron Lett.* **1987**, *28*, 1243–1246. doi:10.1016/S0040-4039(00)95336-X.
- S4 Yang, K.S.; Hudson, B. Computation of deuterium isotope perturbation of  $^{13}\text{C}$  NMR chemical shifts of alkanes: A Local Mode Zero-Point Level approach. *J. Phys. Chem. A* **2010**, *114*, 12283–12290. doi:10.1021/jp105913x.
- S5 Aydin, R.; Wesener, J.R.; Günther, H.; Santillan, R.L.; Garibay, M.E.; Joseph-Nathan, P. On the stereospecificity of intrinsic  $^2\text{H}$ - $^1\text{H}$  NMR isotope effects on carbon-13 chemical-shifts in cyclohexanes. *J. Org. Chem.* **1984**, *49*, 3845–3847. doi:10.1021/jo00194a040.
- S6 O’Leary, D.J.; Allis, D.G.; Hudson, B.S.; James, S.; Morgera, K.B.; Baldwin, J.E. Vicinal deuterium perturbations on hydrogen NMR chemical shifts in cyclohexanes. *J. Am. Chem. Soc.* **2008**, *130*, 13659–13663. doi:10.1021/ja802903a.
- S7 Aydin, R.; Frankmölle, W.; Schmalz, D.; Günther, H. Deuterium-Induced NMR Isotope Shifts for  $^{13}\text{C}$  Resonance Frequencies of Norbornane - Quantitative Data for the Dihedral Angle Dependence of Vicinal Shifts. *Magn. Res. Chem.* **1988**, *26*, 408–411. doi:10.1002/mrc.1260260511.
- S8 Mlinarić-Majerski, K.; Vinković, V.; Meić, Z.; Gassman, P.G.; Chyall, L.J. Long-Range Deuterium-Isotope Effects In  $^{13}\text{C}$  NMR-Spectra Of Adamantane And 2-Adamantanone. *J. Mol. Struct.* **1992**, *267*, 389–394. doi:10.1016/0022-2860(92)87061-Y.
